# Supplementary material
Source: PubMed Central journal article supplement (PMC3193502)
Supplement: cr201197x2.pdf [file cr201197x2.pdf]

Supplementary information, Figure S2



**Figure S2** Global gene-expression profiling of D5 and D10 cell lines and the parental oGFP<sup>+</sup> ESCs by DNA microarrays. **(A)** Pearson correlation analysis and a dendrogram showed that D5 and D10 cell lines are closely clustered with each other and differ from their parental cell line. **(B)** Pluripotent genes, differentiation genes, imprinted genes and other significantly up- or down-regulated genes were indicated in the scatter correlation graphs and real-time RT-PCR results. Passage 26 of the parental oGFP<sup>+</sup> ESCs, passage 8 of the D5 cell line and passage 7 of the D10 cell line were used in our study.
