# Supplementary material
Source: PubMed Central journal article supplement (PMC3193502)
Supplement: cr201197x3.pdf [file cr201197x3.pdf]

Supplementary information, Figure S3

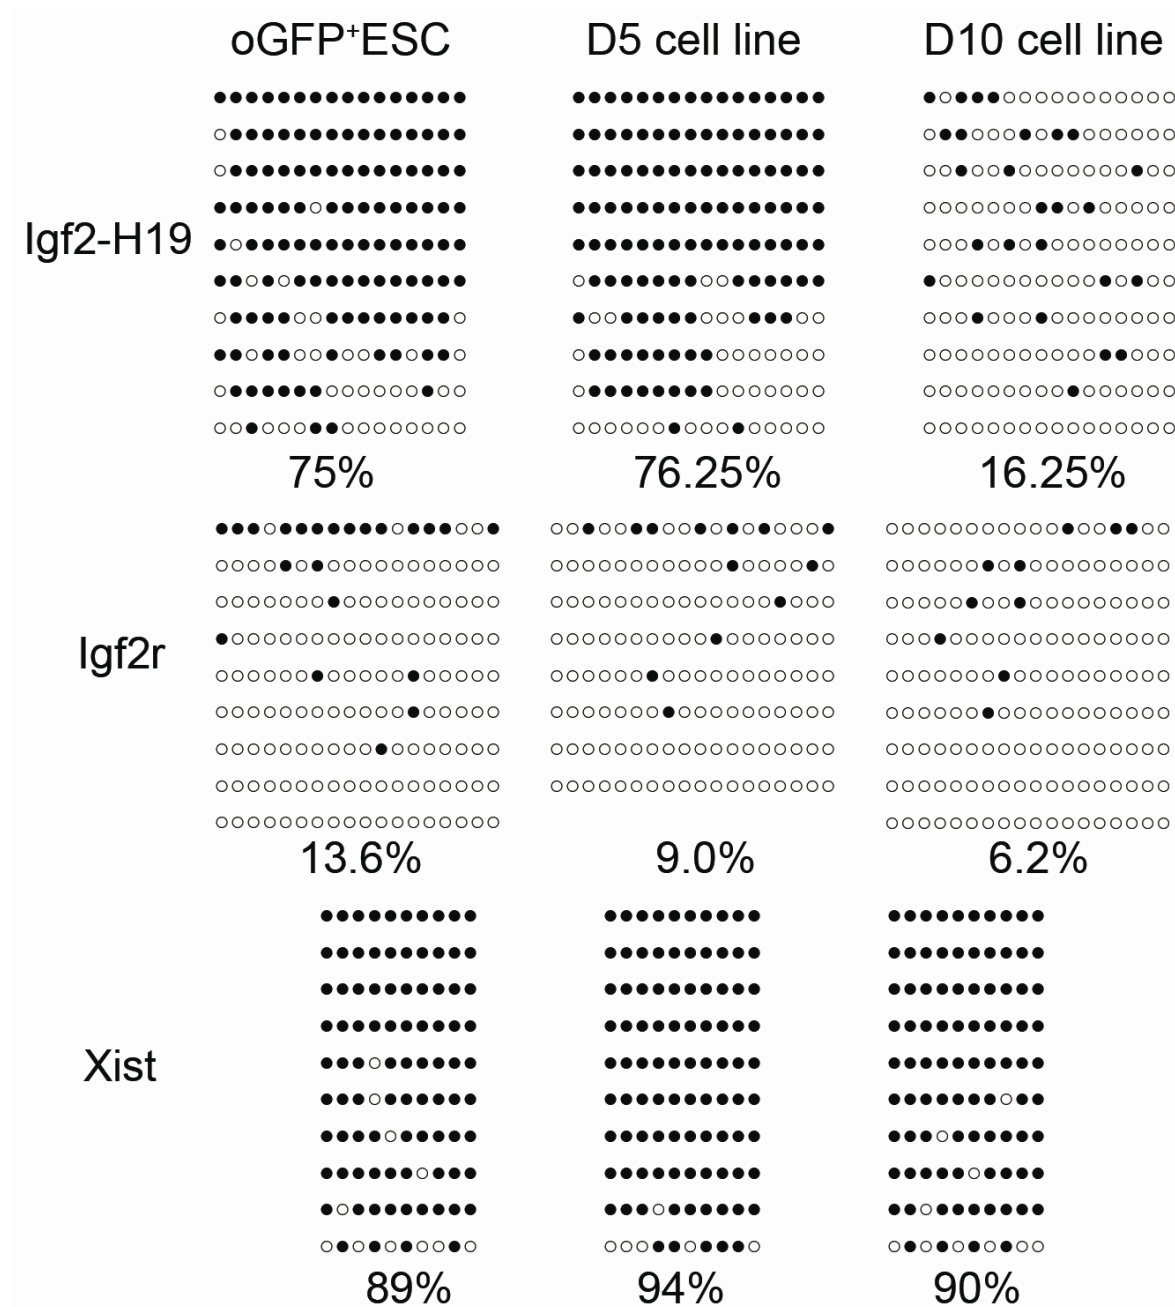

**Figure S3** Methylation status of imprinted genes. Methylation status of imprinted genes in oGFP<sup>+</sup> ESCs, D5 and D10 cell lines was determined using bisulphate sequencing. The D10 cell lines showed significant hypomethylation (16.25%) of the differently methylated regions for the *Igf2-H19* locus, but the methylation patterns of the differently methylated regions for *Igf2r* and *Xist* in the D5 and D10 cell lines are similar to the oGFP<sup>+</sup> ESCs.
