# Supplementary material
Source: PubMed Central journal article supplement (PMC3193502)
Supplement: cr201197x4.pdf [file cr201197x4.pdf]

## Supplementary information, Table S1

Eight ESC lines were recovered from a total of 141 irradiated recipients that were transplanted with the Oct4-driven GFP<sup>+</sup> ESCs. Tumor formation rate was 28-29% in the irradiated hosts and 7.5% in the unirradiated hosts.

|                                                           | Irradiated group                                                                                                  |                                   | Unirradiated group                |                                   |
|-----------------------------------------------------------|-------------------------------------------------------------------------------------------------------------------|-----------------------------------|-----------------------------------|-----------------------------------|
|                                                           | oGFP <sup>+</sup> ESCs                                                                                            | aGFP <sup>+</sup> ESCs            | oGFP <sup>+</sup> ESCs            | aGFP <sup>+</sup> ESCs            |
| <b>Total number of recipients</b>                         | <b>141</b>                                                                                                        | <b>103</b>                        | <b>64</b>                         | <b>53</b>                         |
| <b>Intra-tibia cells</b>                                  | <b>1 × 10<sup>6</sup></b>                                                                                         | <b>1 × 10<sup>6</sup></b>         | <b>5 × 10<sup>6</sup></b>         | <b>5 × 10<sup>6</sup></b>         |
| <b>Sorted GFP<sup>+</sup> cells after transplantation</b> | <b>2.7 × 10<sup>5</sup> (D5)</b>                                                                                  | <b>2.5 × 10<sup>5</sup> (D5)</b>  | <b>2.6 × 10<sup>5</sup> (D5)</b>  | <b>2.8 × 10<sup>5</sup> (D5)</b>  |
|                                                           | <b>2.2 × 10<sup>5</sup> (D10)</b>                                                                                 | <b>3.7 × 10<sup>5</sup> (D10)</b> | <b>6.5 × 10<sup>4</sup> (D10)</b> | <b>2.4 × 10<sup>5</sup> (D10)</b> |
|                                                           | <b>4.3 × 10<sup>4</sup> (D15)</b>                                                                                 | <b>7.0 × 10<sup>5</sup> (D15)</b> | <b>5.0 × 10<sup>3</sup> (D15)</b> | <b>1.7 × 10<sup>5</sup> (D15)</b> |
|                                                           | <b>1.0 × 10<sup>4</sup> (D20)</b>                                                                                 | <b>3.1 × 10<sup>5</sup> (D56)</b> |                                   | <b>3.1 × 10<sup>4</sup> (D62)</b> |
|                                                           | <b>9.5 × 10<sup>3</sup> (D25)</b>                                                                                 | <b>2.6 × 10<sup>5</sup> (D71)</b> |                                   |                                   |
| <b>Recovered cell lines</b>                               | <b>3 cell lines (D5)<br/>1 cell line (D10)<br/>2 cell lines (D12)<br/>1 cell line (D15)<br/>1 cell line (D23)</b> | <b>0</b>                          | <b>0</b>                          | <b>0</b>                          |
| <b>Tumor numbers (%)</b>                                  | <b>40 (28.4%)</b>                                                                                                 | <b>30 (29.1%)</b>                 | <b>0</b>                          | <b>4 (7.5%)</b>                   |
